# Supplementary material for: A feasible multilayer structure design for solid lubricant coatings in a lunar environment
Source: Royal Society of Chemistry journal article supplement (doi:10.1039/c6ra14314h), 2016-01-01
Supplement: c6ra14314h1.pdf [file c6ra14314h1.pdf]

Fig. S1 shows the evolution of friction coefficient as a function of sliding time for MoS<sub>2</sub>/DLC multilayer coatings against steel ball without SLD condition. As shown in Fig. S1, the friction coefficients decreased first and increased afterward with bilayer period. And the MoS<sub>2</sub>/DLC-4L coating with the lowest value of 0.02 can be selected as the optimum coating.

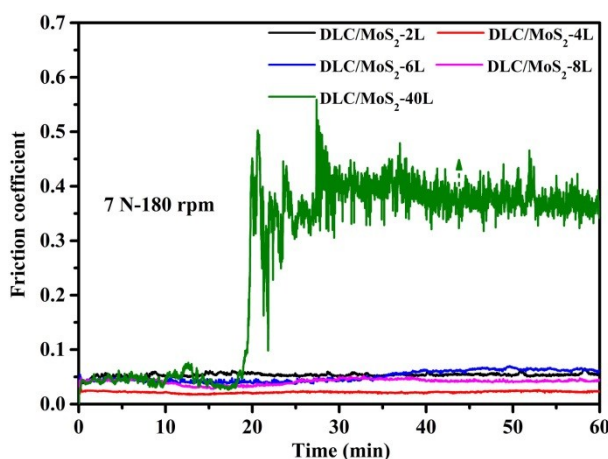

**Fig. S1** Variation in friction coefficients of MoS<sub>2</sub>/DLC multilayer coatings sliding against steel ball as a function of the sliding time under the applied load of 7 N in high vacuum without SLD.

Fig. S2 shows the wear rates of MoS<sub>2</sub>/DLC-4L coating under different applied loads without SLD. As shown in Fig. S2, the wear rates increased gradually with the increasing of applied load.

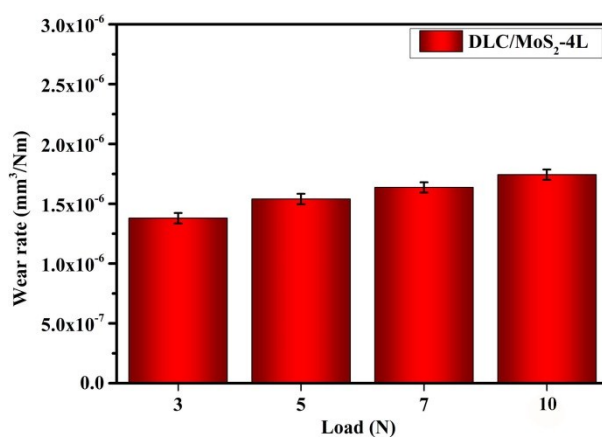

**Fig. S2** Wear rates of MoS<sub>2</sub>/DLC-4L coating sliding against steel ball without SLD under different applied load in high vacuum.
